# Supplementary material for: Swelling-Resistant, Crosslinked Polyvinyl Alcohol Membranes with High ZIF-8 Nanofiller Loadings as Effective Solid Electrolytes for Alkaline Fuel Cells
Source: MDPI journal article supplement (doi:10.3390/nano12050865), 2022-03-04
Supplement: s1 [file s1]

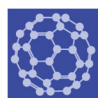

## Supplementary information

# Swelling-Resistant, Crosslinked Polyvinyl Alcohol Membranes with High ZIF-8 Nanofiller Loadings as Effective Solid Electrolytes for Alkaline Fuel Cells

Po-Ya Hsu <sup>1,†</sup>, Ting-Yu Hu <sup>1,†</sup>, Selvaraj Rajesh Kumar <sup>1</sup>, Kevin C.-W. Wu <sup>2,3\*</sup> and Shingjiang Jessie Lue <sup>1,4,5,\*</sup>

<sup>1</sup> Department of Chemical and Materials Engineering, Chang Gung University, Guishan District, Taoyuan City 333, Taiwan; mini50636@gmail.com (P.-Y.H.); hu70308@gmail.com (T.-Y.H.); rajeshkumarnst@gmail.com (S.R.K.)

<sup>2</sup> Department of Chemical Engineering, National Taiwan University, Taipei City 106, Taiwan

<sup>3</sup> Institute of Biomedical Engineering and Nanomedicine, National Health Research Institutes, Miaoli County 350, Taiwan

<sup>4</sup> Department of Safety, Health and Environment Engineering, Ming Chi University of Technology, Taishan, New Taipei City 243, Taiwan

<sup>5</sup> Division of Joint Reconstruction, Department of Orthopedics, Chang Gung Memorial Hospital, Linkou, Taoyuan City 333, Taiwan

\* Correspondence: kevinwu@ntu.edu.tw (K.C.-W.W.); jessie@mail.cgu.edu.tw (S.J.L.); Tel.: +886-3366-3064 (K.C.-W.W.); +866-3211-8800 (ext. 5489) (S.J.L.); Fax: +886-3211-8700 (S.J.L.)

† Equivalent contribution to first author.

**Table S1.** Comparison of acid and alkaline-based PVA composite electrolytes for direct methanol fuel cells.

| Electrolyte types | Membranes                   | Filler loading (wt%) | MeOH Con. (M) | Catalyst load (mg cm <sup>-2</sup> ) |                    | Temperature (°C) | Peak power density (P <sub>max</sub> ) mW cm <sup>-2</sup> | Source                        |
|-------------------|-----------------------------|----------------------|---------------|--------------------------------------|--------------------|------------------|------------------------------------------------------------|-------------------------------|
|                   |                             |                      |               | Anode (Pt-Ru)                        | Cathode (Pt)       |                  |                                                            |                               |
| Acid-doped        | CBA/Nafion-PVA              | -                    | 2             | 4                                    | 4                  | 80               | 68.7                                                       | Li et al. [1] (2018)          |
|                   | PVA/alumina                 | 20                   | 1             | 2                                    | 2                  | 60               | 6.3                                                        | Imaan et al. [2] (2021)       |
|                   | PVA/SSA-GO                  | 1                    | 1             | 3                                    | 1                  | 50               | 19.5                                                       | Castell et al. [3] (2020)     |
|                   | PVA coated Nafion           | -                    | 7             | 3.5                                  | 3.5                | 25               | 30                                                         | Rao et al. [4] (2021)         |
| Without KOH       | PVA/AA-TiO <sub>2</sub> /GA | 3                    | 2             | 2                                    | 2                  | 70               | 58.3                                                       | Mohanapriya et al. [5] (2016) |
|                   | CBC/PVA/zeolite             | 10                   | 0.74          | 30wt% <sup>a</sup>                   | 20wt% <sup>a</sup> | 80               | 6.5                                                        | Altaf et al. [6] (2020)       |
|                   | CBC/PVA/zeolite             | 50                   | 0.74          | 30wt% <sup>a</sup>                   | 20wt% <sup>a</sup> | 80               | 4.8                                                        | Altaf et al. [6] (2020)       |

|           |                       |      |             |     |     |    |      |                         |
|-----------|-----------------------|------|-------------|-----|-----|----|------|-------------------------|
| KOH-doped | Qchitosan-PVA/LDH@CNT | 1    | 2 (5 M KOH) | 4   | 2   | 80 | 107  | Gong et al. [7] (2019)  |
|           | Qchitosan-PVA/LDH     | 5    | 2 (6 M KOH) | 4   | 2   | 60 | 97.8 | Hu et al. [8] (2019)    |
|           | Qchitosan-PVA/3D-LDH  | 6    | 2 (5 M KOH) | 4   | 2   | 60 | 73   | Zhao et al. [9] (2021)  |
|           | PVA/HH/GA             | 5    | 3 (2 M KOH) | 2   | 2   | 60 | 12.1 | Gaur et al. [10] (2021) |
|           | PVA-FP/[DimL]/GA      | 2.5  | 3 (5 M KOH) | 0.5 | 0.5 | 70 | 48   | Wang et al. [11] (2019) |
|           | PVA/40.5% ZIF-8/GA    | 40.5 | 2 (6 M KOH) | 2   | 1   | 60 | 191  | This work               |

<sup>a</sup> Data shown in weight percentage. Catalyst loadings is not determine.

CBA- 4-carboxybenzaldehyde

AA-TiO<sub>2</sub>- Amino acid functionalized titanium oxide

Qchitosan - Quaternized chitosan

LDH@CNT- Layered double hydroxide@ carbon nanotubes

3D-LDH- Three-dimensional hierarchial flower-like LDH

HH- Hair hydrolysate

FP/[DimL]- Pyridine functionalized geminal-imidazolium-type ionic liquid

CBC- *N-p*-carboxy benzyl chitosan

PVA-b-PVBTAC- Poly (vinyl alcohol-b-vinyl benzene trimethyl ammonium chloride)

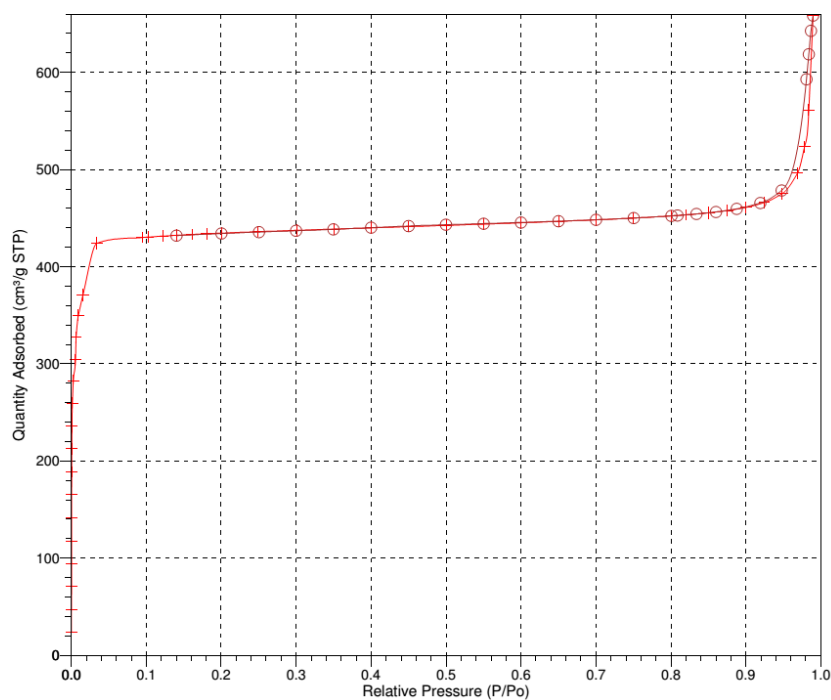

Figure S1. Nitrogen adsorption-desorption isotherm of ZIF-8 nanoparticles.

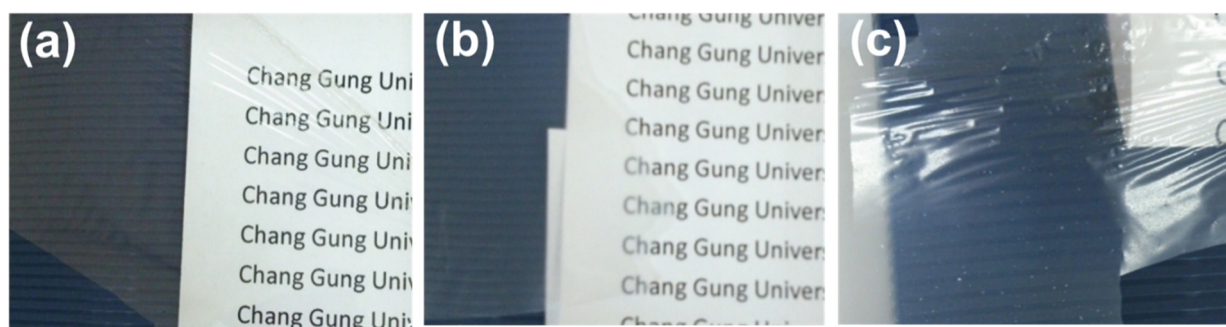

**Figure S2.** Photographic images of (a) PVA/GA, (b) PVA/40.5%ZIF-8/GA, and (c) PVA/45.4%ZIF-8/GA composite membranes.

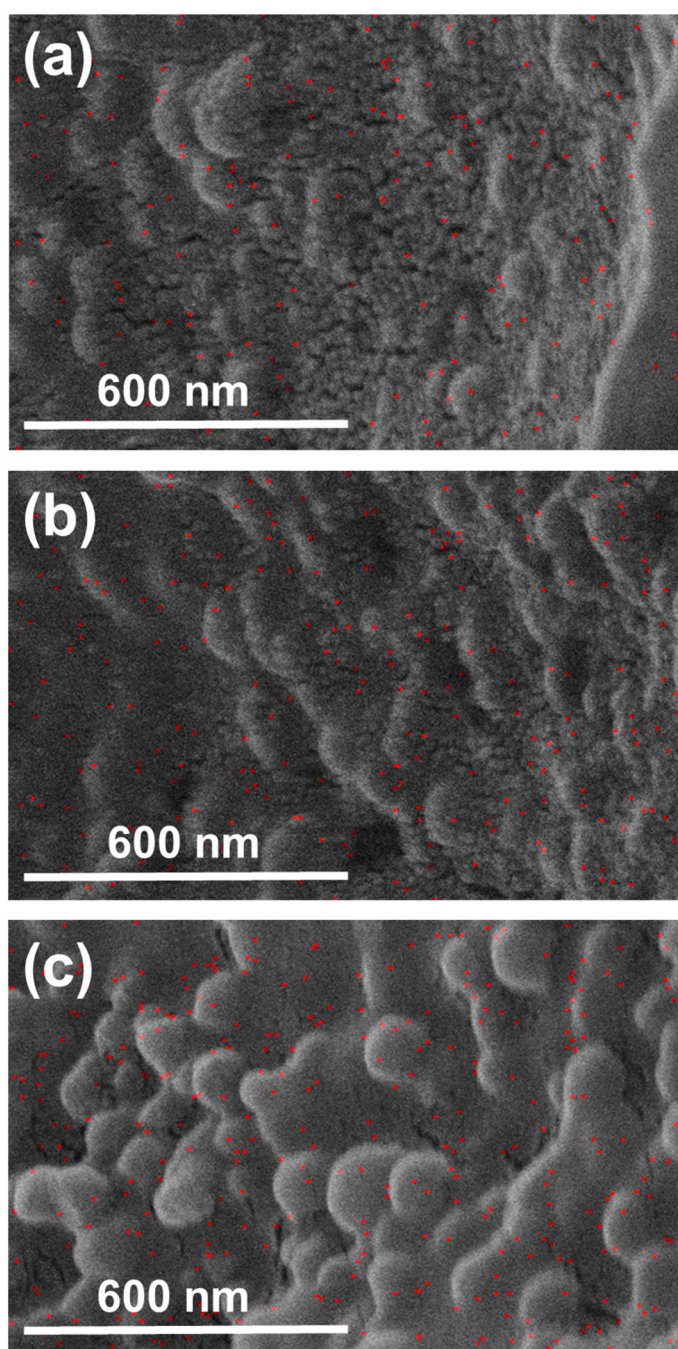

**Figure S3.** EDX mapping micrographs showing Zn distribution in (a) PVA/25.4%ZIF-8/GA, (b) PVA/40.5%ZIF-8/GA, and (c) PVA/45.4%ZIF-8/GA composite membranes.

**Table S2.** The weight percentages (determined from EDS) of PVA/ZIF-8/GA composites with various ZIF-8 loadings.

| ZIF loadings | 0%     | 25%    | 40.5%  | 45.4%  |
|--------------|--------|--------|--------|--------|
| Element      | Wt (%) | Wt (%) | Wt (%) | Wt (%) |
| C            | 72.47  | 76.96  | 68.46  | 68.21  |
| O            | 27.53  | 14.48  | 18.04  | 16.27  |
| Zn           | -      | 8.56   | 13.50  | 15.52  |

## References

- [1] Y. Li, L. Liang, C. Liu, Y. Li, W. Xing, J. Sun, Self-Healing Proton-Exchange Membranes Composed of Nafion–Poly (vinyl alcohol) Complexes for Durable Direct Methanol Fuel Cells, *Advanced Materials*, 30 (2018) 1707146.
- [2] D.u. Imaan, F.Q. Mir, B. Ahmad, Proton exchange membrane based on poly (vinyl alcohol) as support and alpha alumina as filler and its performance in direct methanol fuel cell, *Journal of Environmental Chemical Engineering*, 9 (2021) 106119.
- [3] O. Gil-Castell, Ó. Santiago, B. Pascual-Jose, E. Navarro, T.J. Leo, A. Ribes-Greus, Performance of Sulfonated Poly(Vinyl Alcohol)/Graphene Oxide Polyelectrolytes for Direct Methanol Fuel Cells, *Energy Technology*, 8 (2020) 2000124.
- [4] A.S. Rao, K.R. Rashmi, D.V. Manjunatha, A. Jayarama, V. Veena Devi Shastrimath, R. Pinto, Methanol crossover reduction and power enhancement of methanol fuel cells with polyvinyl alcohol coated Nafion membranes, *Materials Today: Proceedings*, 35 (2021) 344–351.
- [5] S. Mohanapriya, G. Rambabu, S. Suganthi, S.D. Bhat, V. Vasanthkumar, V. Anbarasu, V. Raj, Bio-functionalized hybrid nanocomposite membranes for direct methanol fuel cells, *RSC Advances*, 6 (2016) 57709–57721.
- [6] F. Altaf, R. Batool, R. Gill, M.A. Shabir, M. Drexler, F. Alamgir, G. Abbas, A. Sabir, K.I. Jacob, Novel N-p-carboxy benzyl chitosan/poly (vinyl alcohol)/functionalized zeolite mixed matrix membranes for DMFC applications, *Carbohydrate Polymers*, 237 (2020) 116111.
- [7] C. Gong, S. Zhao, W.-C. Tsen, F. Hu, F. Zhong, B. Zhang, H. Liu, G. Zheng, C. Qin, S. Wen, Hierarchical layered double hydroxide coated carbon nanotube modified quaternized chitosan/polyvinyl alcohol for alkaline direct methanol fuel cells, *Journal of Power Sources*, 441 (2019) 227176.
- [8] Y. Hu, W.-C. Tsen, F.-S. Chuang, S.-C. Jang, B. Zhang, G. Zheng, S. Wen, H. Liu, C. Qin, C. Gong, Glycine betaine intercalated layered double hydroxide modified quaternized chitosan/polyvinyl alcohol composite membranes for alkaline direct methanol fuel cells, *Carbohydrate Polymers*, 213 (2019) 320–328.
- [9] S. Zhao, W.-C. Tsen, C. Gong, 3D nanoflower-like layered double hydroxide modified quaternized chitosan/polyvinyl alcohol composite anion conductive membranes for fuel cells, *Carbohydrate Polymers*, 256 (2021) 117439.

- 
- [10] S.S. Gaur, P. Dhar, K.M. Wani, M. Srivastava, S. Sakurai, A. Kumar, V. Katiyar, Ion transfer channel network formed by flower and rod shape crystals of hair hydrolysate in poly(vinyl alcohol) matrix and its application as anion exchange membrane in fuel cells, *Journal of Colloid and Interface Science*, 587 (2021) 214–228.
- [11] D. Wang, Y. Wang, J. Wang, L. Wang, Synthesized Geminal-imidazolium-type ionic liquids applying for PVA-FP/[DimL][OH] anion exchange membranes for fuel cells, *Polymer*, 170 (2019) 31–42.
